# Supplementary material
Source: Springer Nature journal article supplement (https://www.springermedizin.de/resource/supplementary/13023_2013_558_MOESM4_ESM.pdf/9642778)
Supplement: MOESM4 [file 9642778]

**A**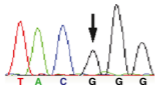

Control

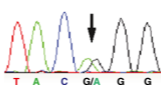

Parent

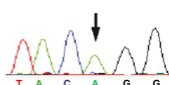

Patient

**B**

|   |   |   |   |   |   |   |   |   |   | R |   |   |   | Patient |   |   |   |                            |
|---|---|---|---|---|---|---|---|---|---|---|---|---|---|---------|---|---|---|----------------------------|
| P | C | G | K | F | L | A | A | G | N | Y | G | Q | I | A       | I | F | S | Human (NP_077315.2)        |
| P | C | G | K | F | L | A | A | G | N | Y | G | Q | I | A       | I | F | S | Chimp (XP_510762.3)        |
| P | C | G | K | F | L | A | A | G | N | Y | G | Q | I | A       | I | F | S | Macaque (XP_001090442.1)   |
| P | C | G | K | F | L | A | A | G | N | Y | G | Q | I | A       | I | F | S | Rat (NP_007360.2)          |
| P | C | G | K | F | L | A | A | G | N | Y | G | Q | I | A       | I | F | S | Mouse (NP_001008425.1)     |
| P | C | G | K | F | L | A | A | G | N | Y | G | Q | I | A       | I | F | S | Dog (XP_536996.3)          |
| P | C | G | K | F | L | V | A | G | N | L | G | Q | I | G       | V | F | S | Frog (NP_001089841.1)      |
| P | C | G | R | Y | L | A | A | G | N | Y | G | E | I | A       | V | F | S | Zebrafish (NP_001006095.1) |
| G | S | K | Q | Y | L | F | A | G | N | L | G | D | I | F       | V | L | R | Fruitfly (NP_648557.1)     |
